# Supplementary material
Source: HighWire-hosted journal article supplement (http://gut.bmjjournals.com/highwire/filestream/192543/field_highwire_adjunct_files/3/Supporting_material_S4.pdf)

**S4 – Plantain NSP blocks translocation of *E. coli* across Caco2cl1 colonocytes.**

Soluble plantain NSP (5 mg/ml) inhibits translocation across Caco2-cl1 monocultures for a range of Crohn's disease mucosa-associated *E. coli* and *E. coli* K12 (N=3). \*, p<0.05 ANOVA.

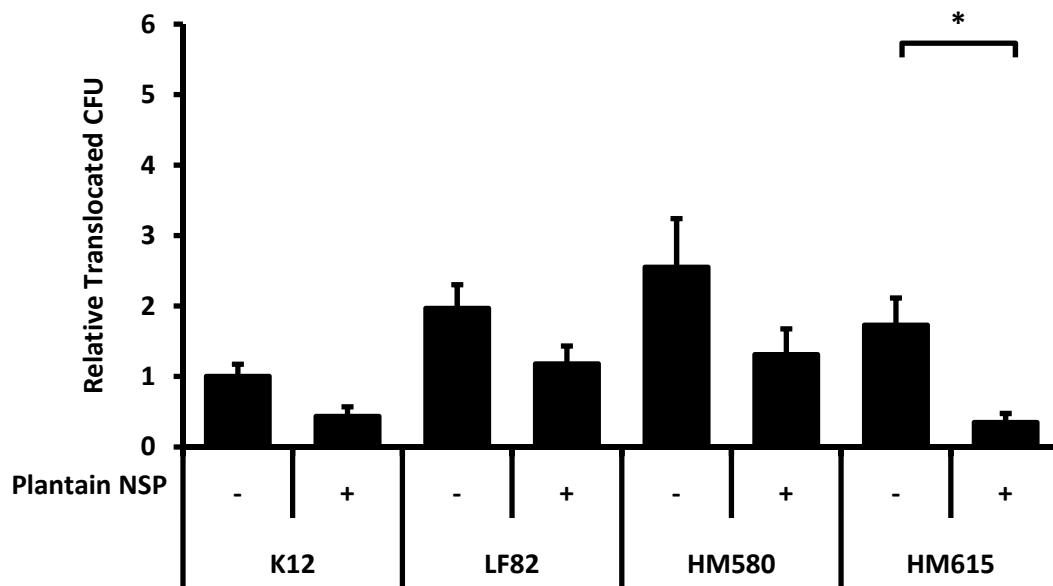

Supplement: Supporting_material_S4.pdf [file Supporting_material_S4.pdf]
